# Supplementary material
Source: publisher figshare collection journal article supplement (https://acs.figshare.com/ndownloader/files/3919168)

# Supporting Information

## **Membrane Active Vancomycin Analogues: A Strategy to Combat Bacterial Resistance**

Venkateswarlu Yarlagadda, Padma Akkapeddi, Goutham B. Manjunath and Jayanta Halder\*

Chemical Biology and Medicinal Chemistry Laboratory, New Chemistry Unit, Jawaharlal Nehru Centre for Advanced Scientific Research, Jakkur, Bengaluru 560064, Karnataka, India.

\*Corresponding Author: [jayanta@jncasr.ac.in](mailto:jayanta@jncasr.ac.in), Telephone: +91-80-2208-2565, Fax: +91-80-2208-2627

### **Table of Contents**

Page S2: Supplementary schemes

Page S3-S8: Supplementary figures and Tables

Page S9-S33: Characterization (HPLC chromatograms, NMR and Mass spectra of vancomycin and new vancomycin analogues)

## I. Supplementary schemes

**Scheme S1:** Synthesis of 3-(tetradecylamino)propyl-vancomycin carboxamide (control compound, **13**).

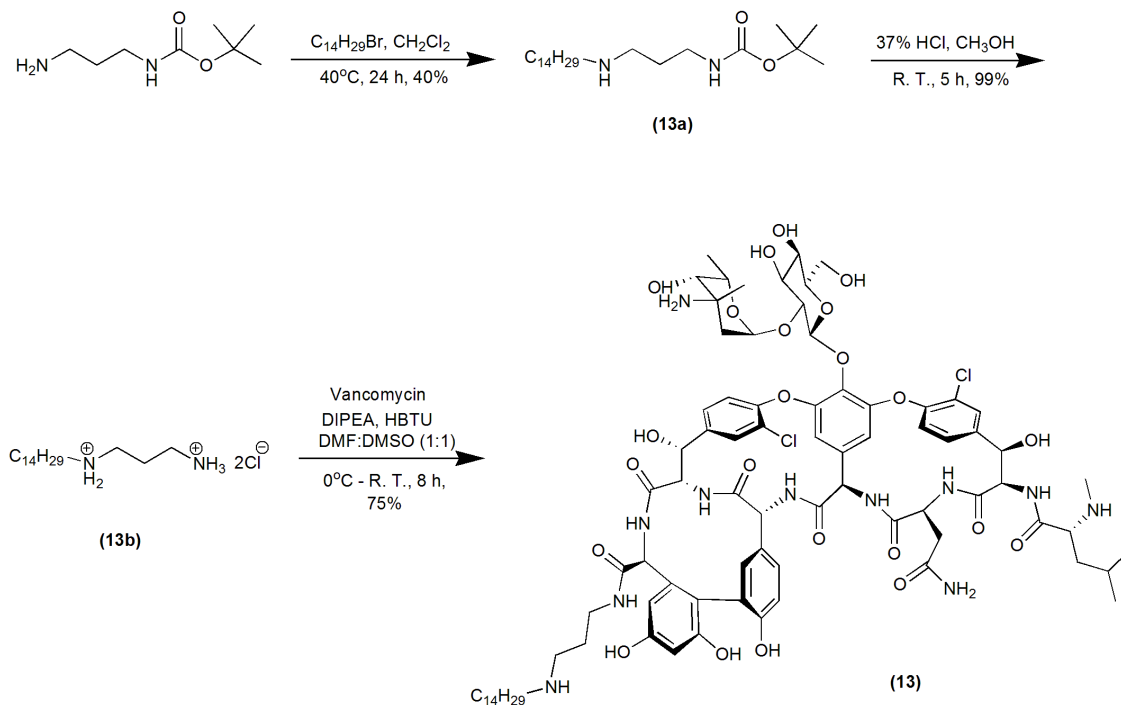

**Scheme S2:** Synthesis of lipophilic cationic segment (control compound, **14**).

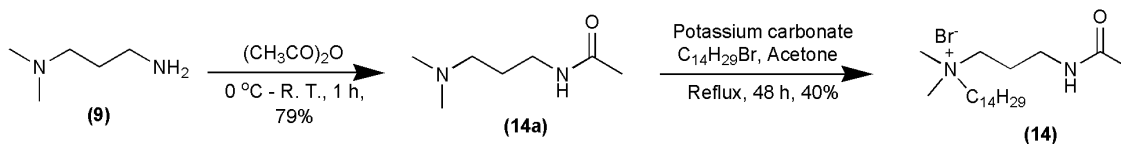

## II. Supplementary figures and Tables

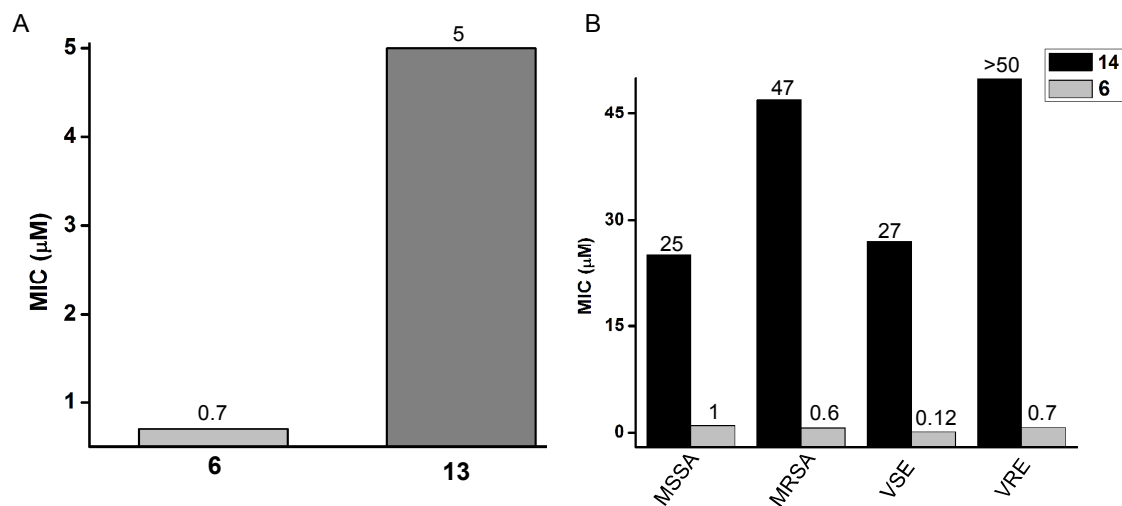

**Figure S1**

Antibacterial activity comparison of control compounds (**13** and **14**) with compound **6**. (A) Antibacterial activity of compounds **13** and **6** against VRE; vancomycin-resistant *E. faecium* (B) Antibacterial activity of compounds **14** and **6** against MSSA; methicillin-sensitive *S. aureus*, MRSA; methicillin-resistant *S. aureus*, VSE; vancomycin-sensitive *E. faecium* and VRE.

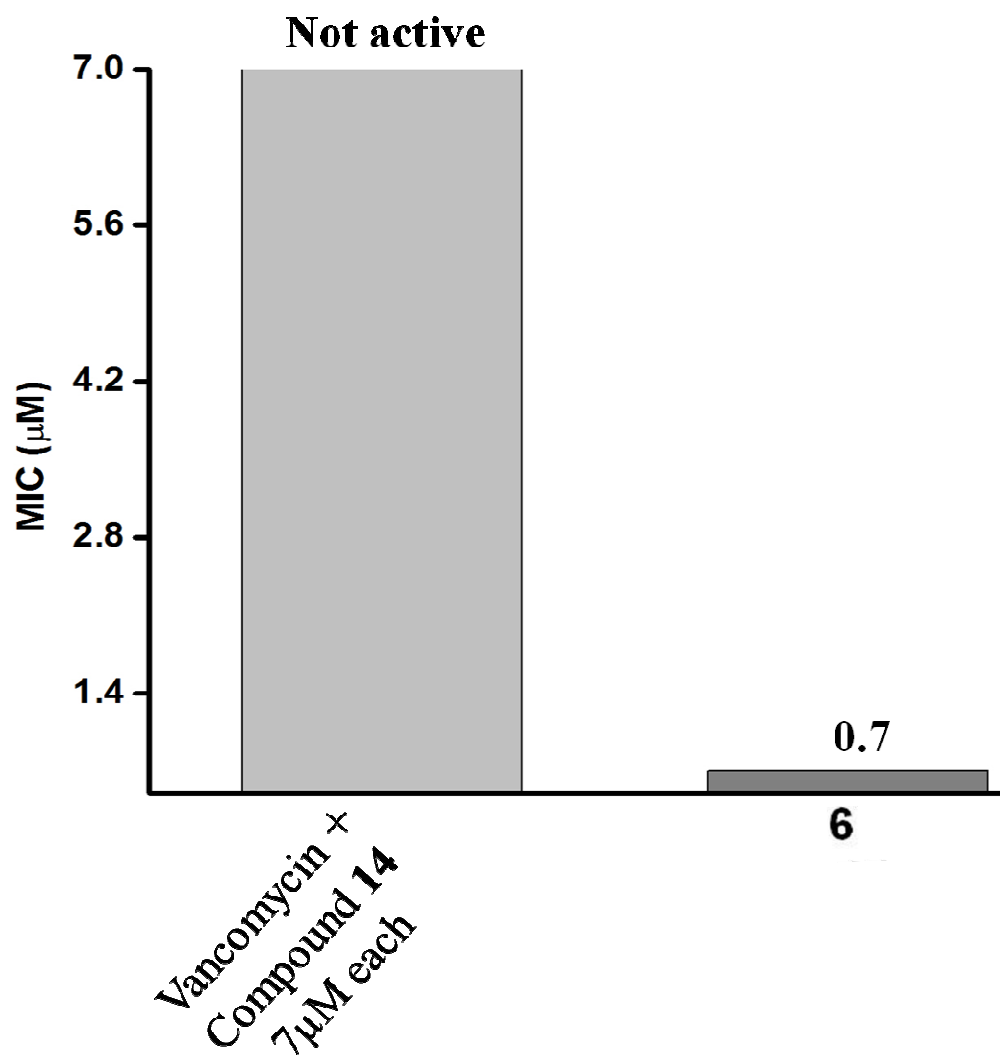

**Figure S2**  
Antibacterial activity of compound **6** and a physical mixture of vancomycin & compound **14** (7 μM each) against vancomycin-resistant Enterococci (VRE).

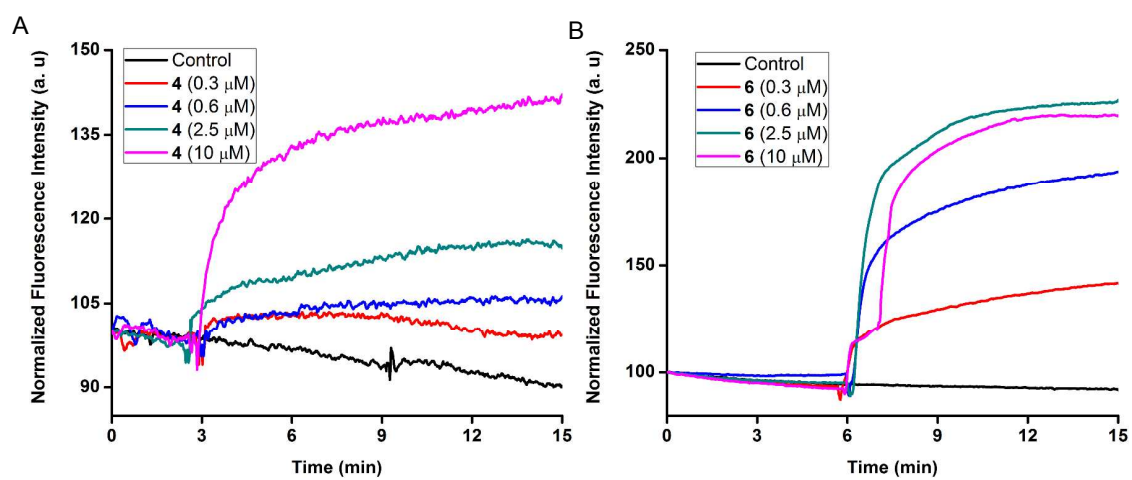

**Figure S3.**  
Concentration dependent membrane depolarization studies of compounds **4** (A) and **6** (B) against MRSA.

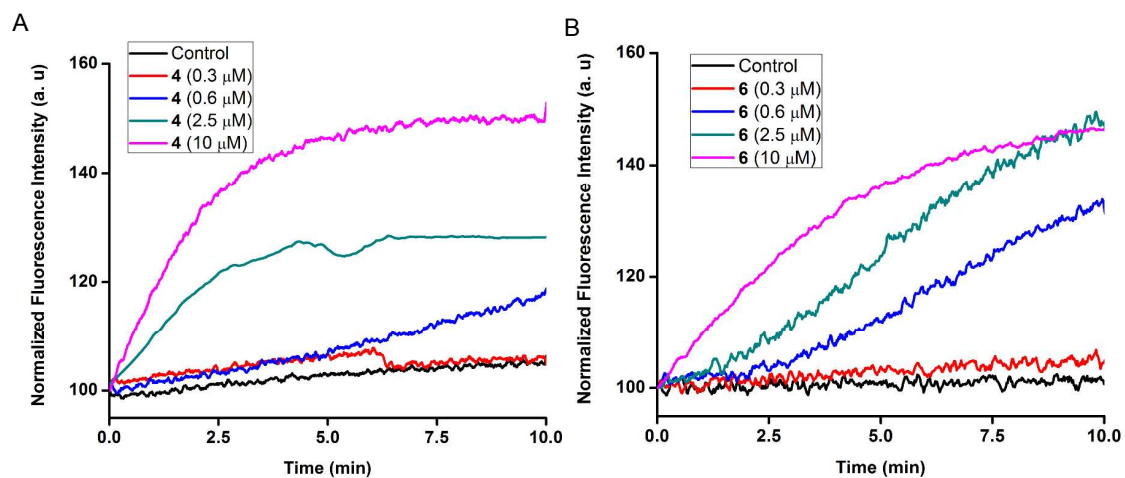

**Figure S4.**  
Concentration dependent membrane permeabilization studies of compounds **4** (A) and **6** (B) against MRSA.

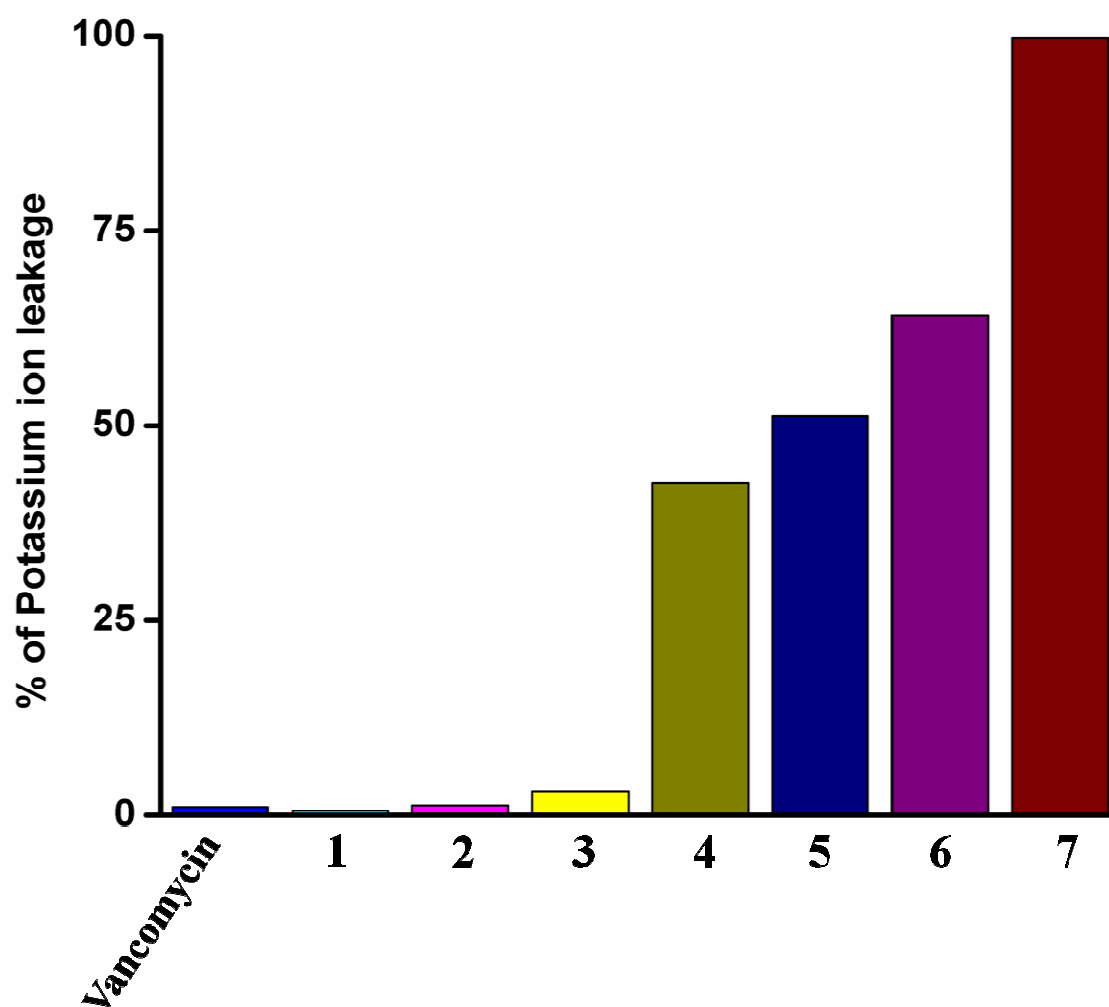

**Figure S5.**  
Percentage of intracellular potassium ion leakage caused by lipophilic cationic vancomycin derivatives (1-7) at 10  $\mu$ M against MRSA considering 100%  $K^+$  leakage for valinomycin (10  $\mu$ M) as a positive control.

**Table S1.**Hemolysis and Cytotoxicity data of vancomycin and compounds **4** and **6**.

| Compound   | (Toxicity, $\mu\text{M}$ )                 |                                      |
|------------|--------------------------------------------|--------------------------------------|
|            | Hemolytic activity<br>( $\text{HC}_{50}$ ) | Cytotoxicity<br>( $\text{EC}_{50}$ ) |
| Vancomycin | 100                                        | 100                                  |
| <b>4</b>   | 1000                                       | 100                                  |
| <b>6</b>   | 100                                        | 100                                  |



### III. Characterization (HPLC chromatograms, NMR and Mass spectra of vancomycin and new vancomycin analogues)

Vancomycin:

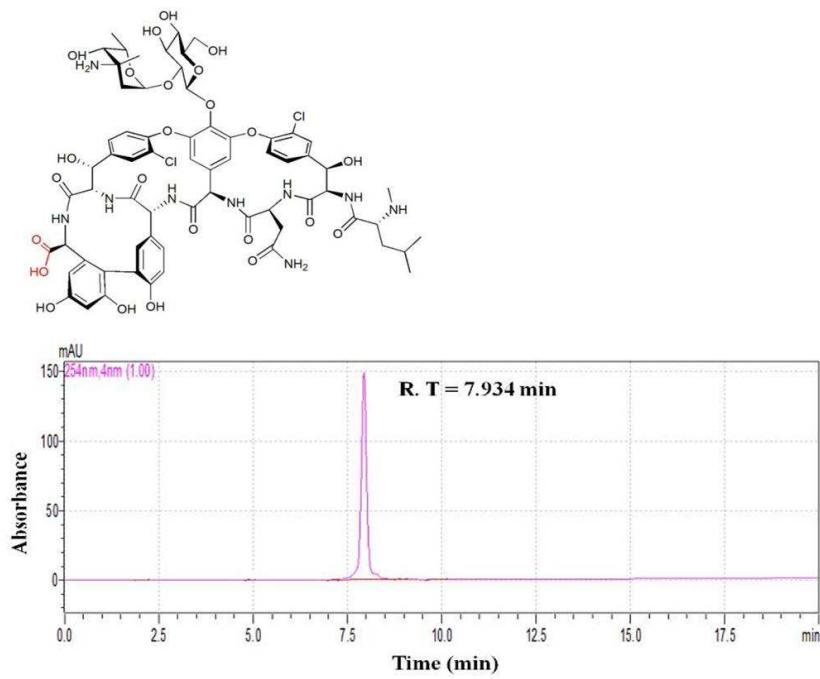

### Vancomycin:

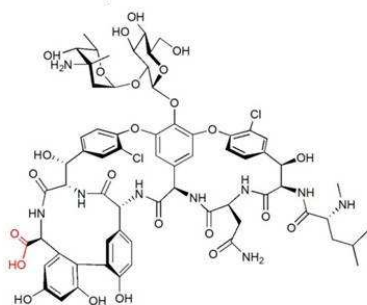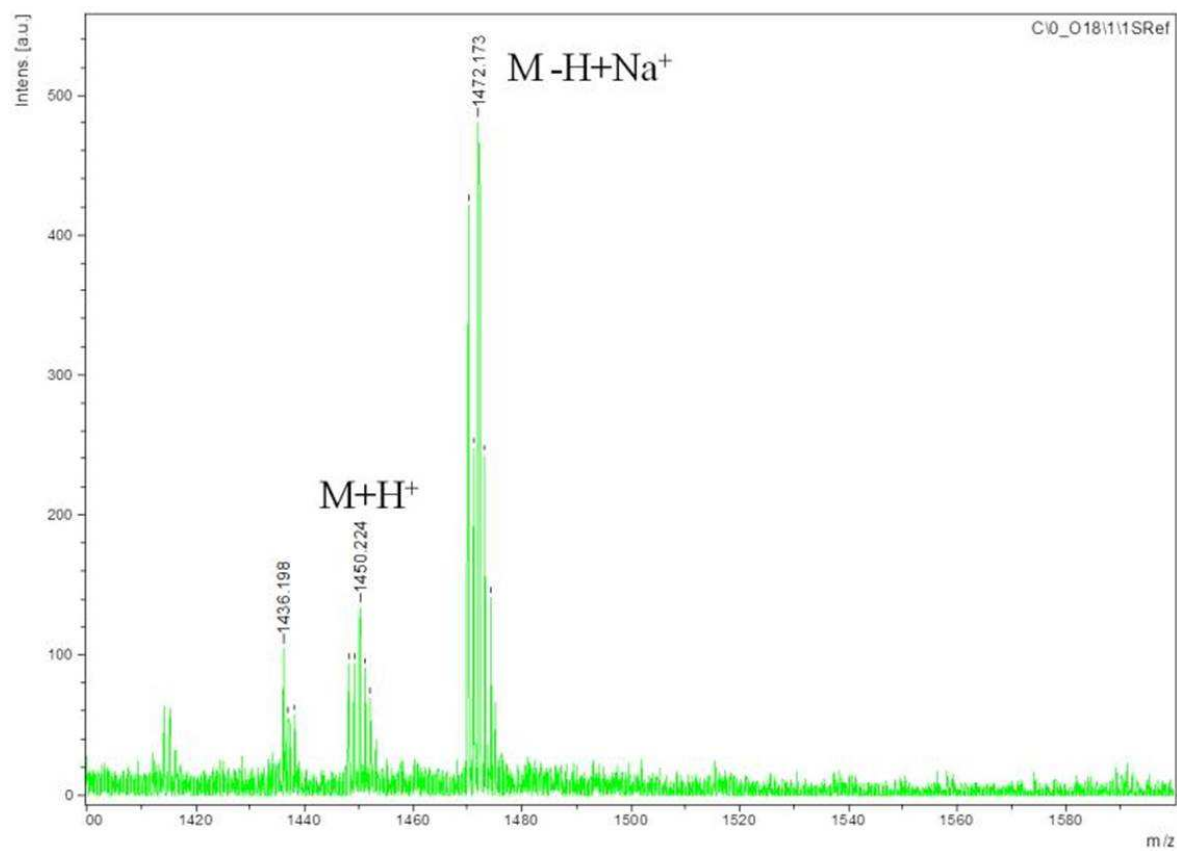

Compound 1:

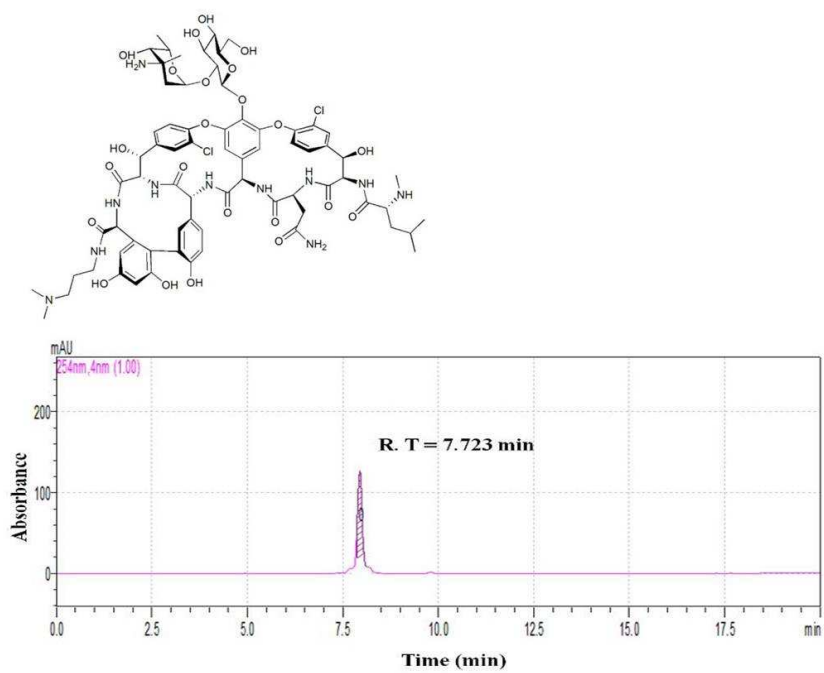

Compound 1:

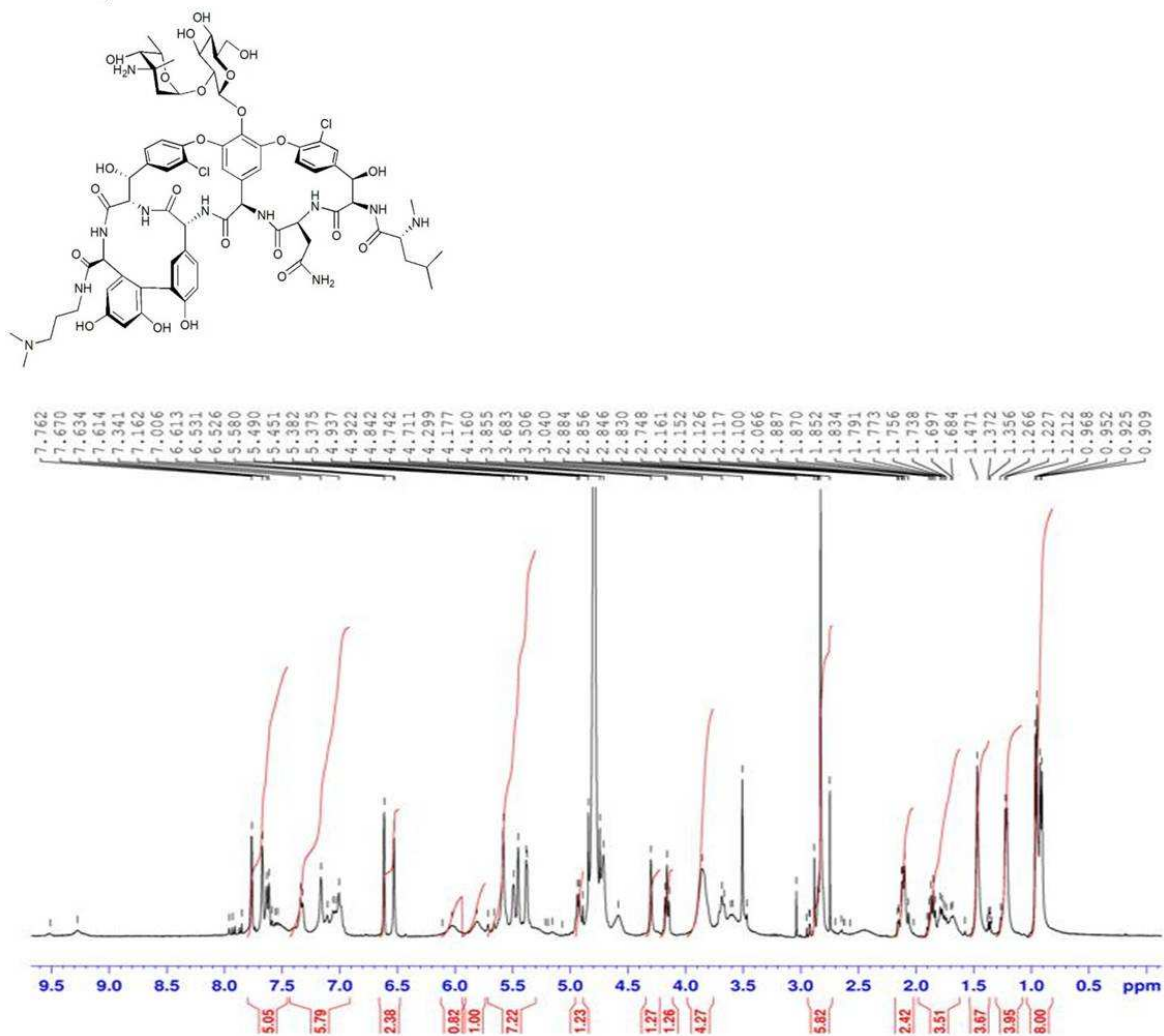

# Compound 1:

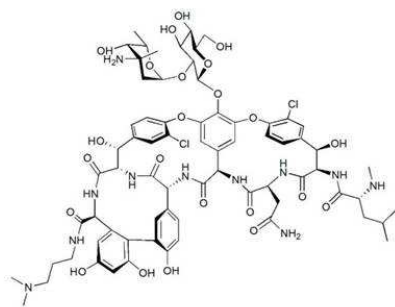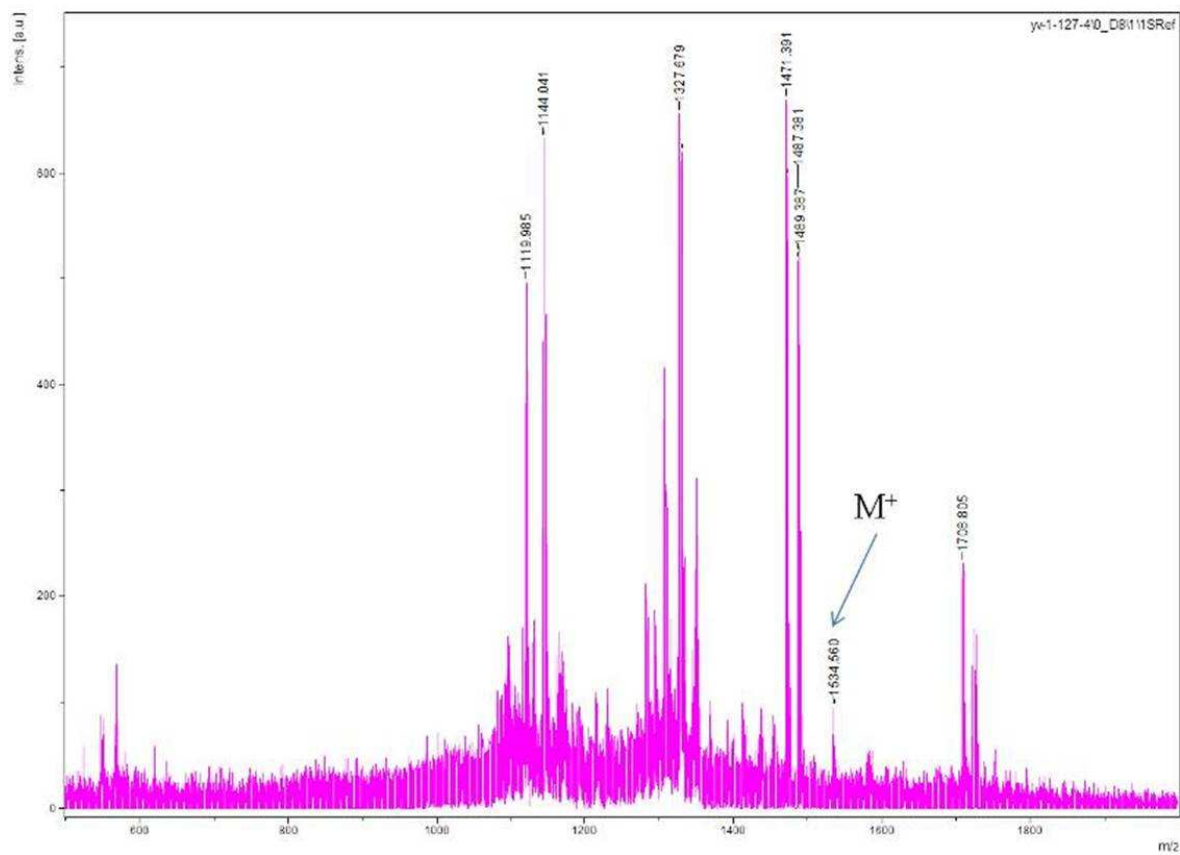

Compound 2:

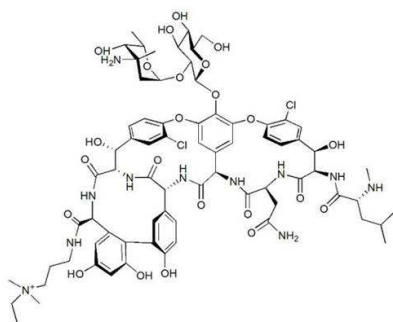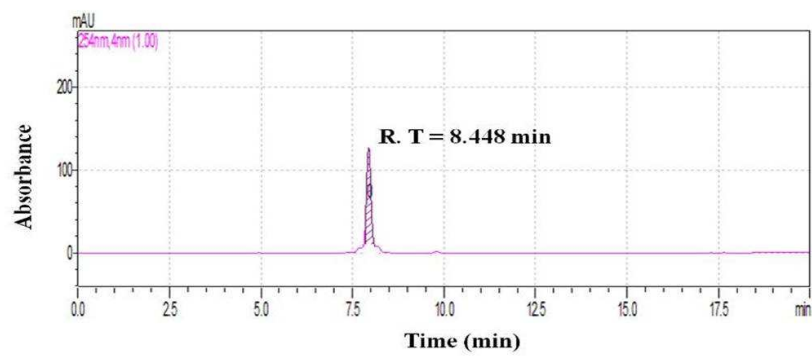

# Compound 2:

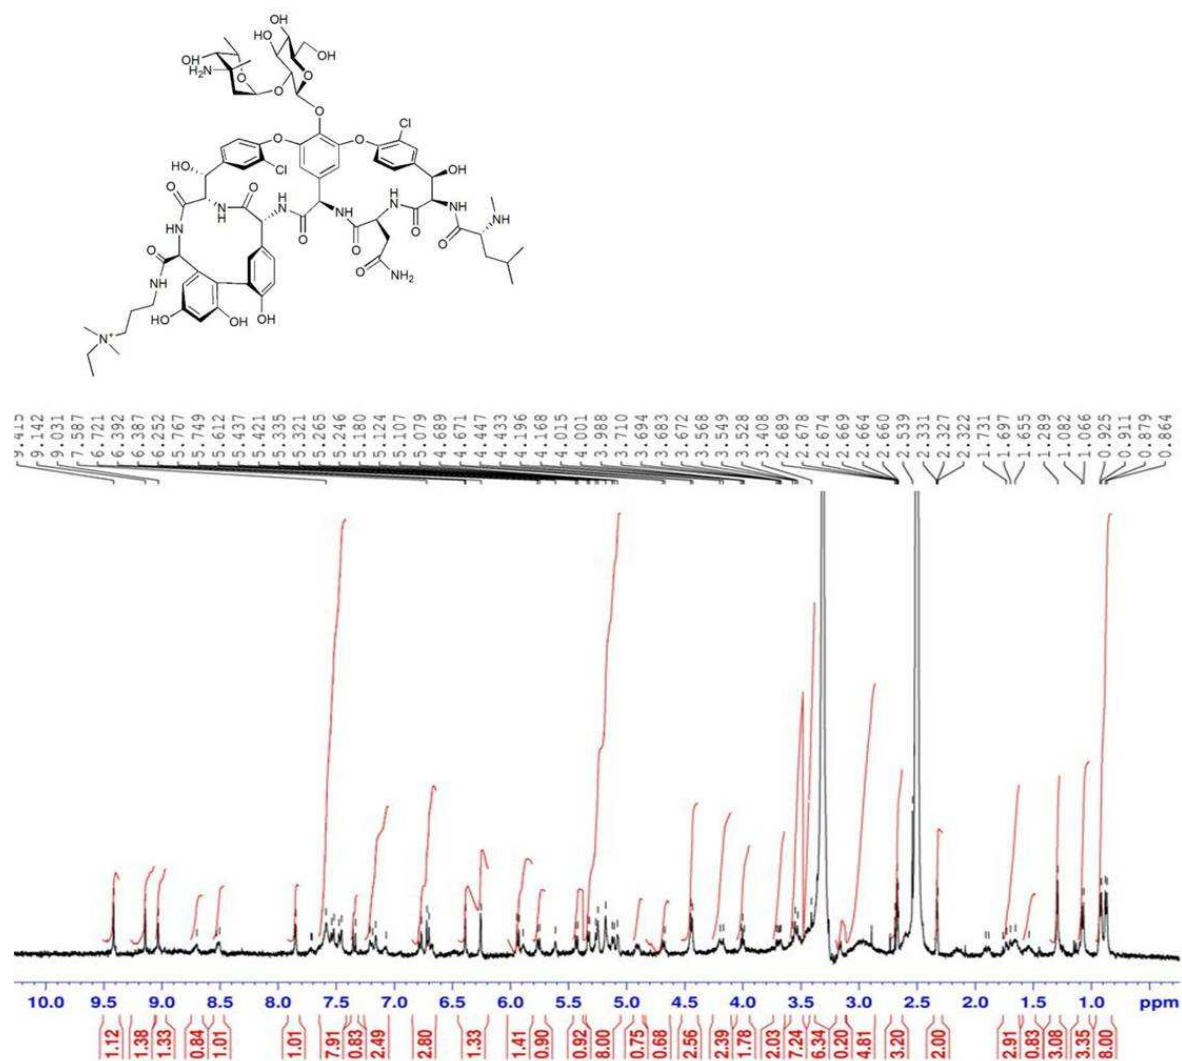

## Compound 2:

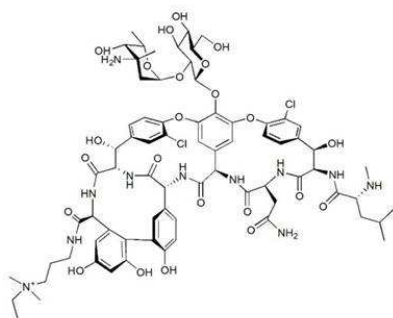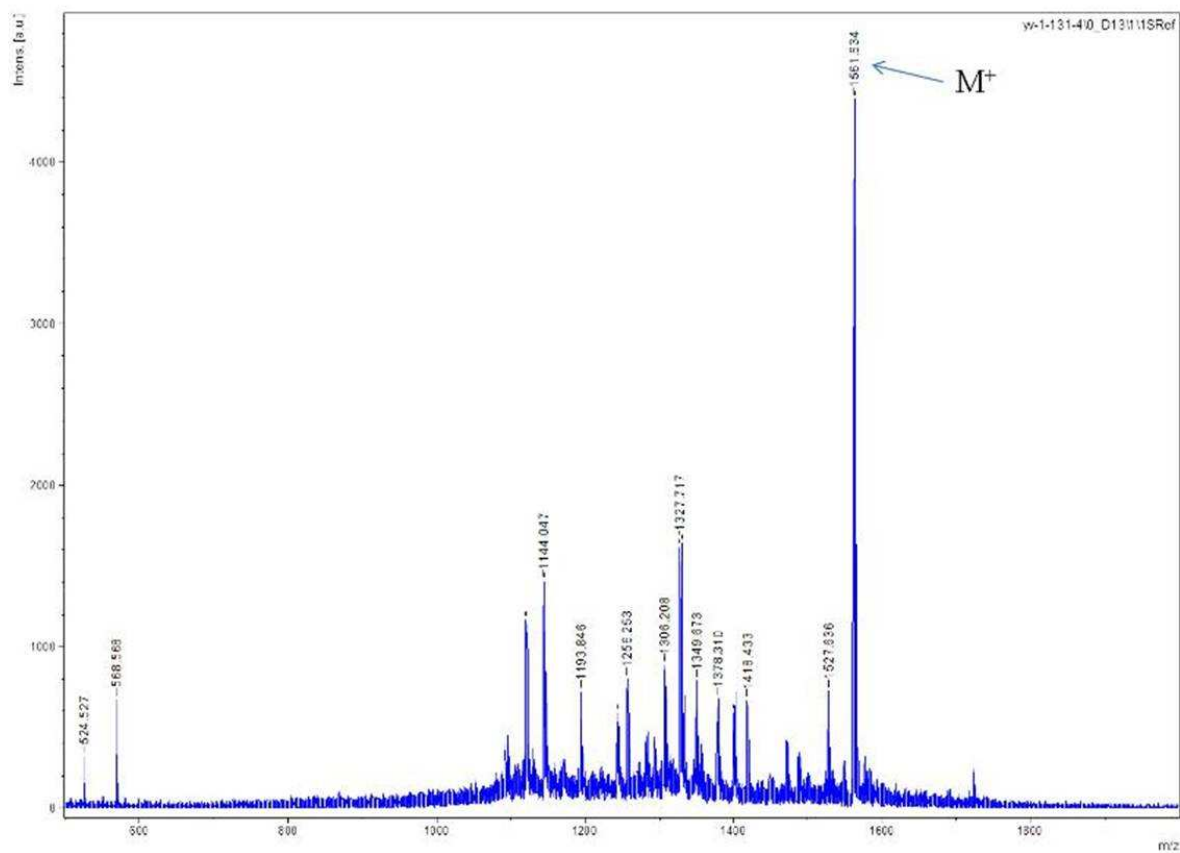



Compound **3**:

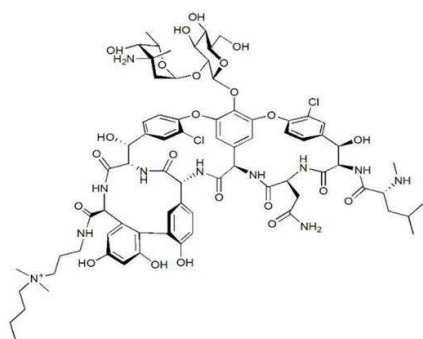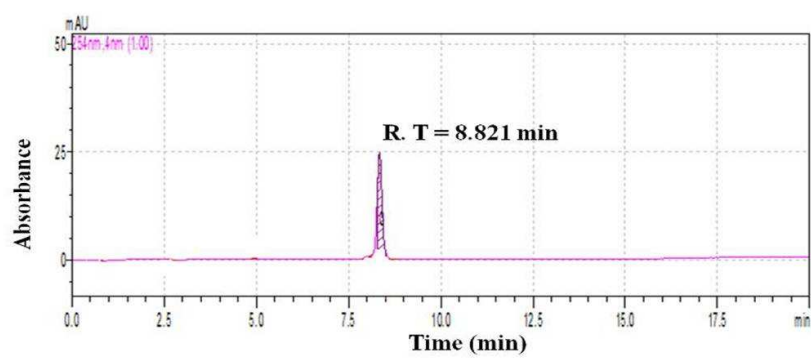

# Compound 3:

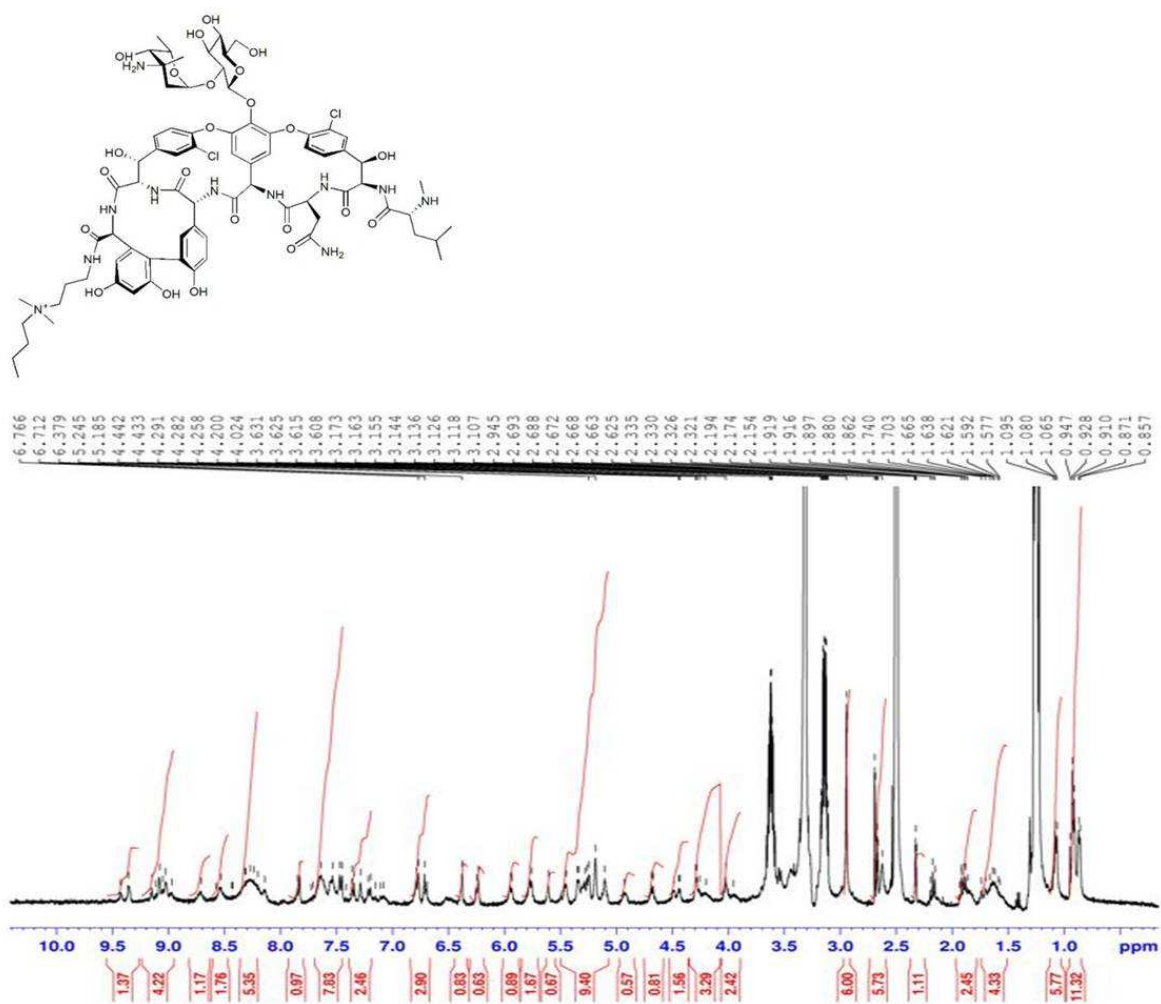

# Compound 3:

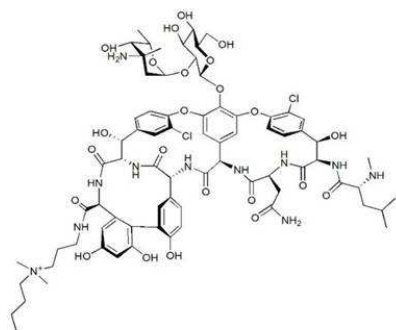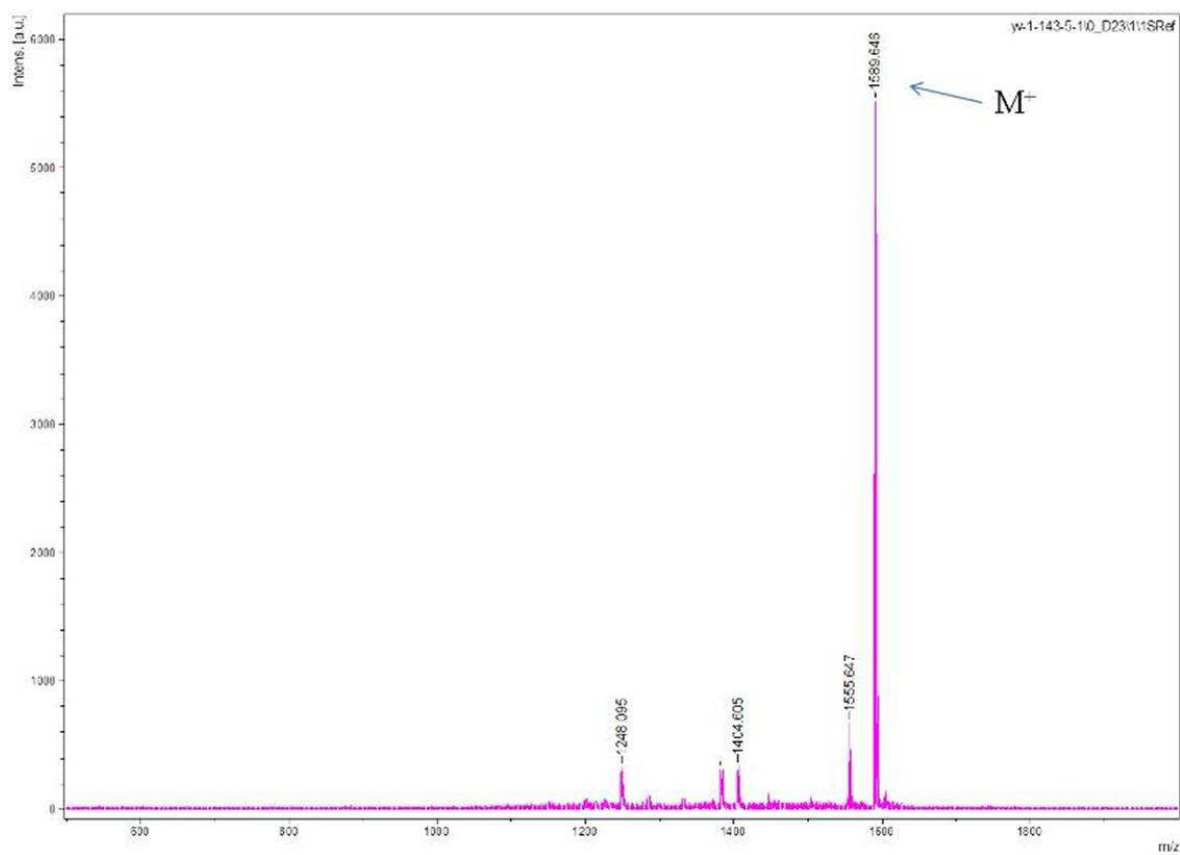

Compound **4**:

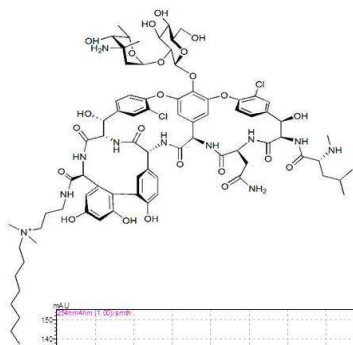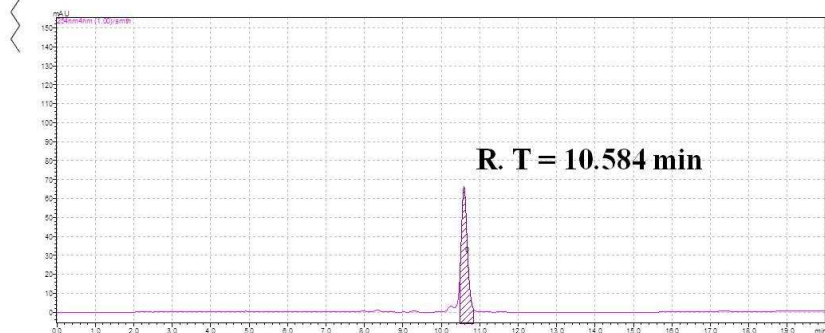

Compound 4:

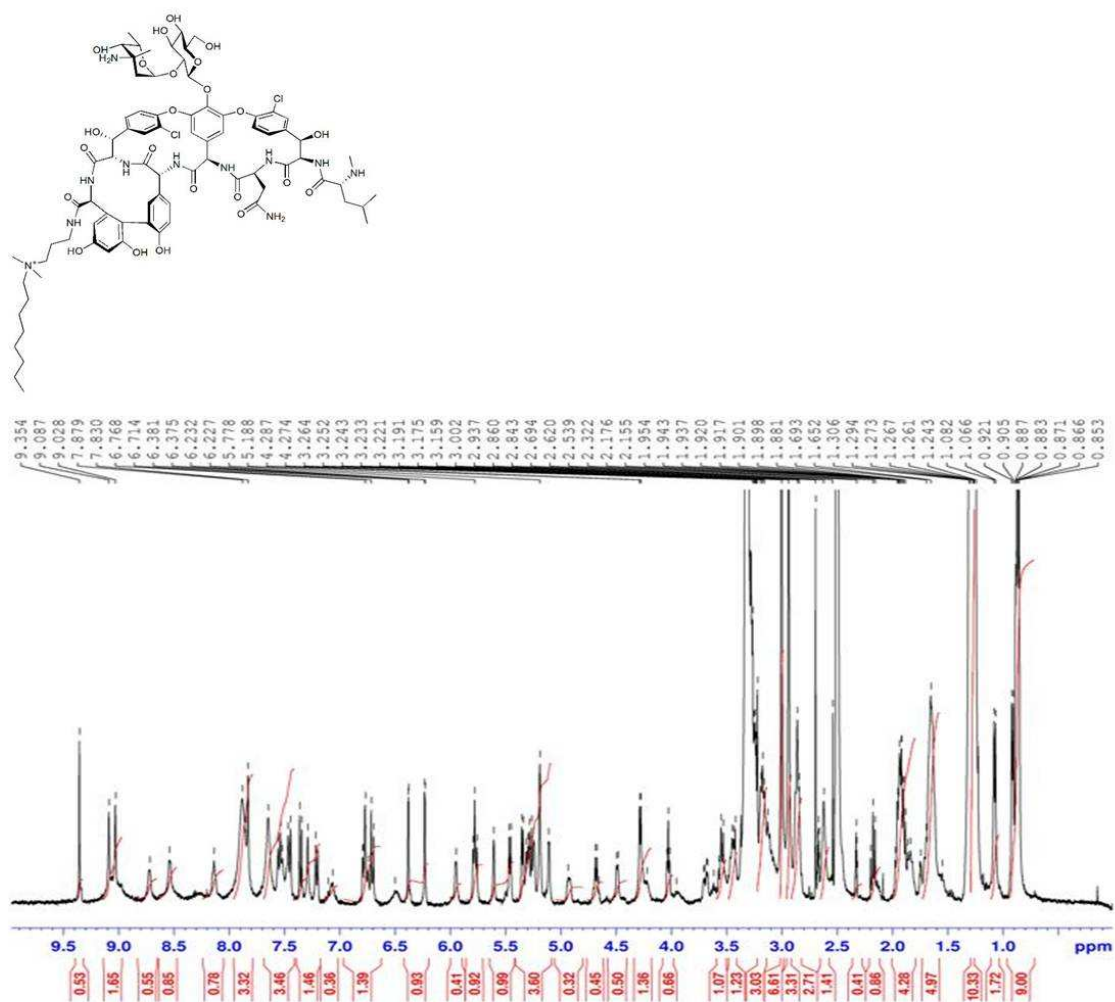

# Compound 4:

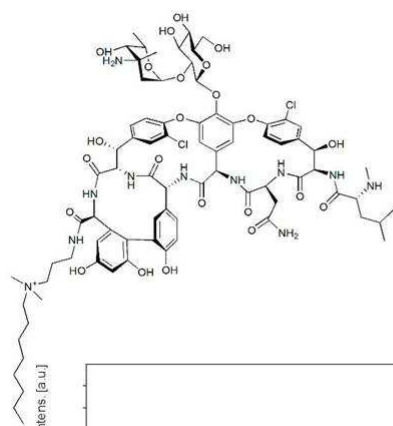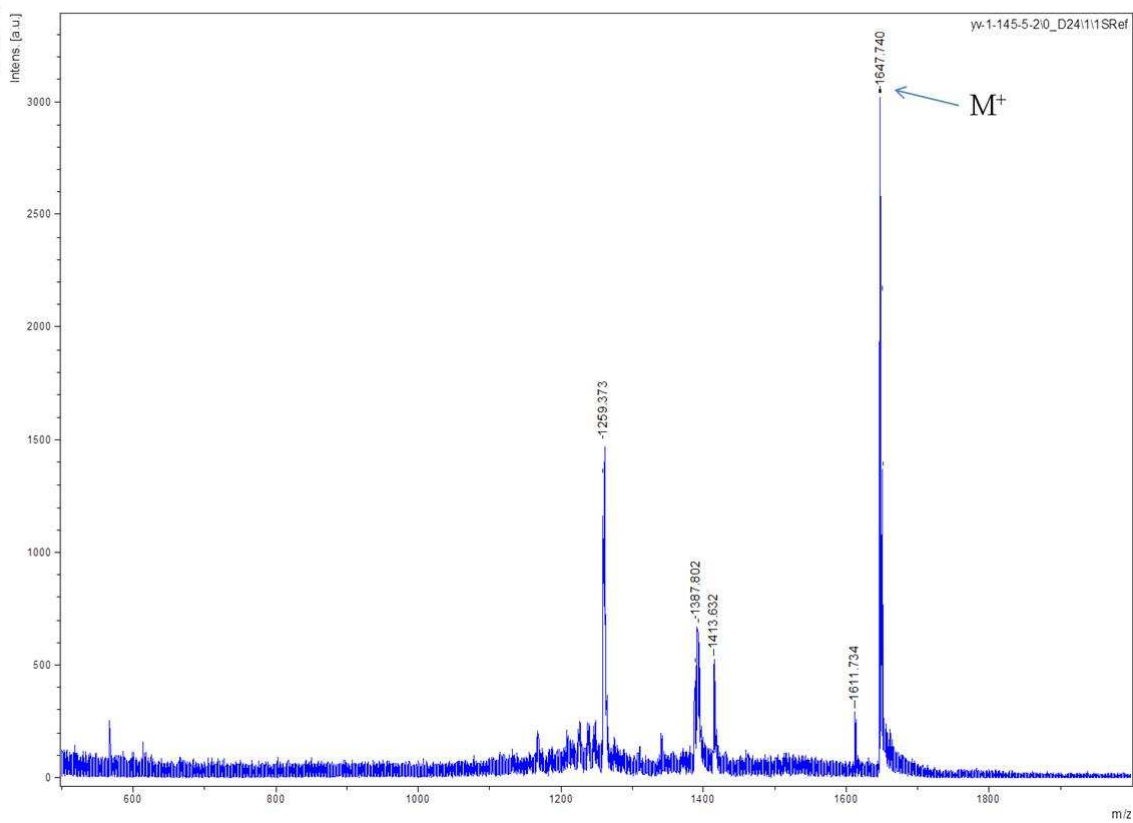

Compound 5:

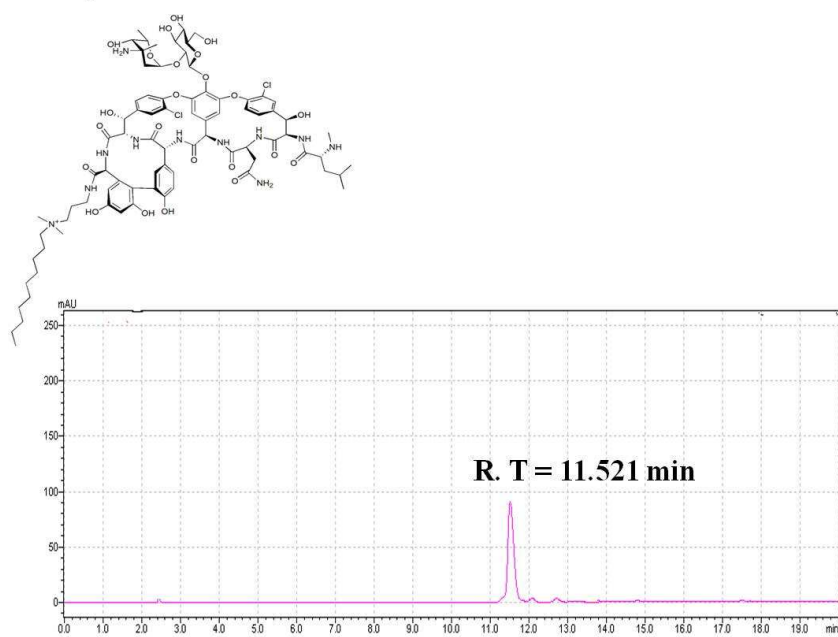

# Compound 5:

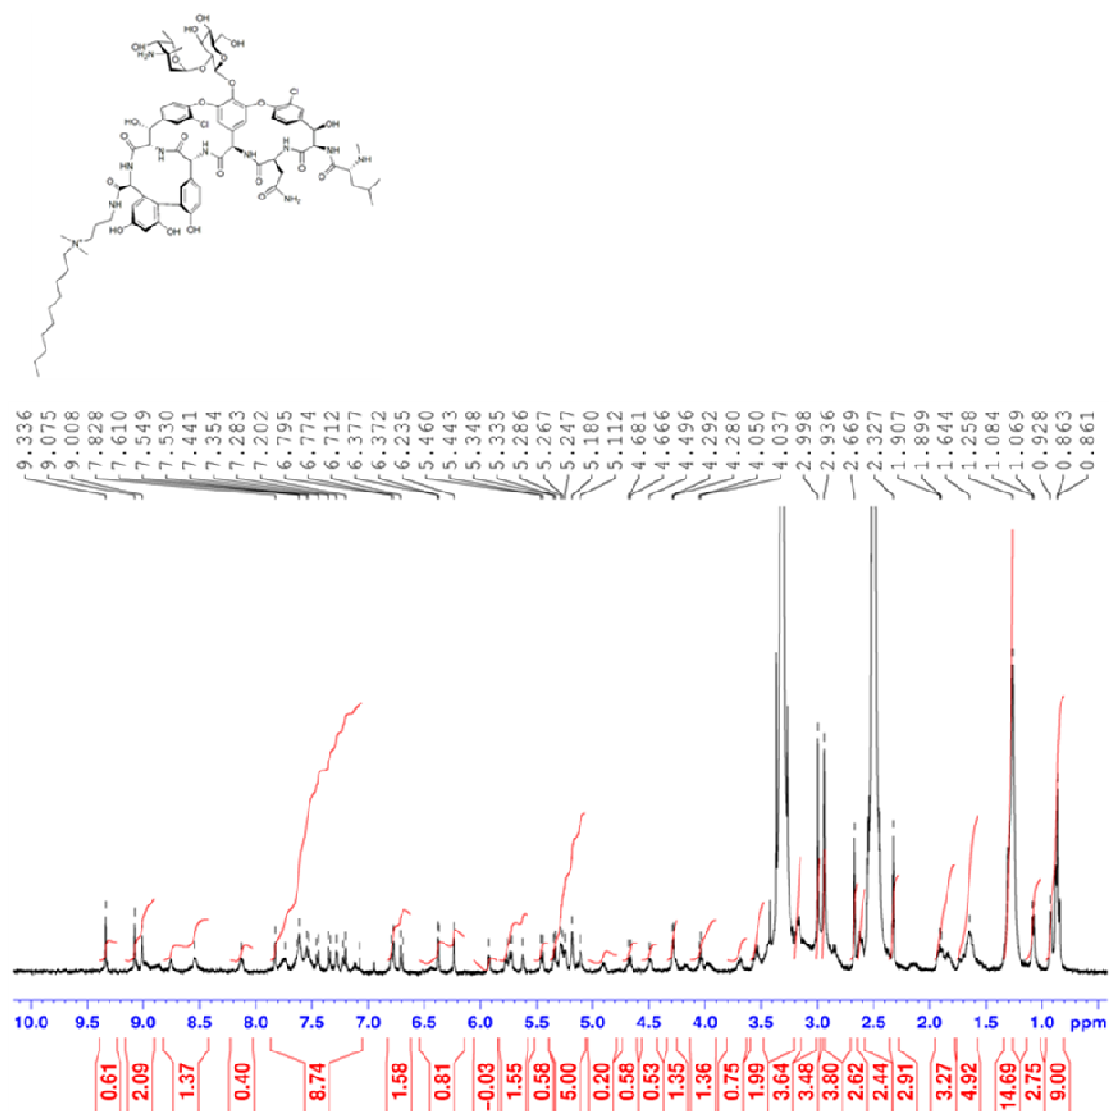



# Compound 5:

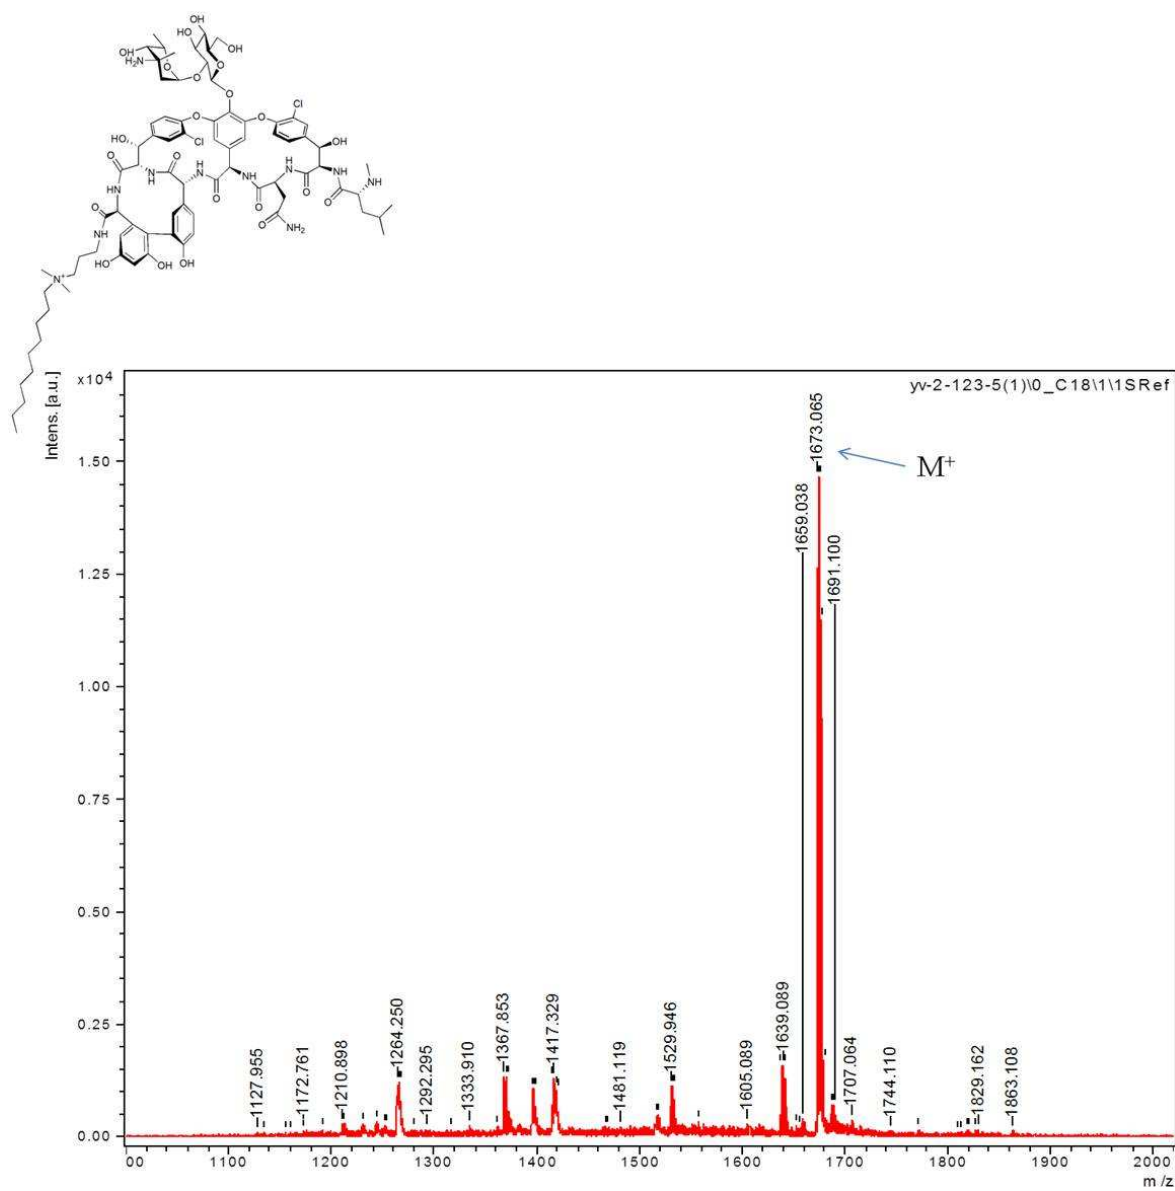

Compound 6:

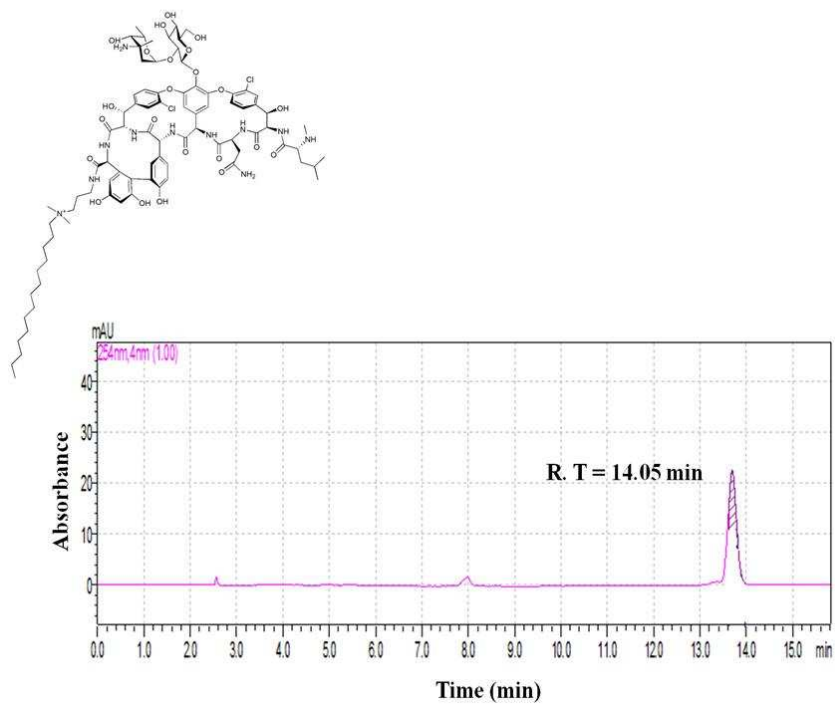

# Compound 6:

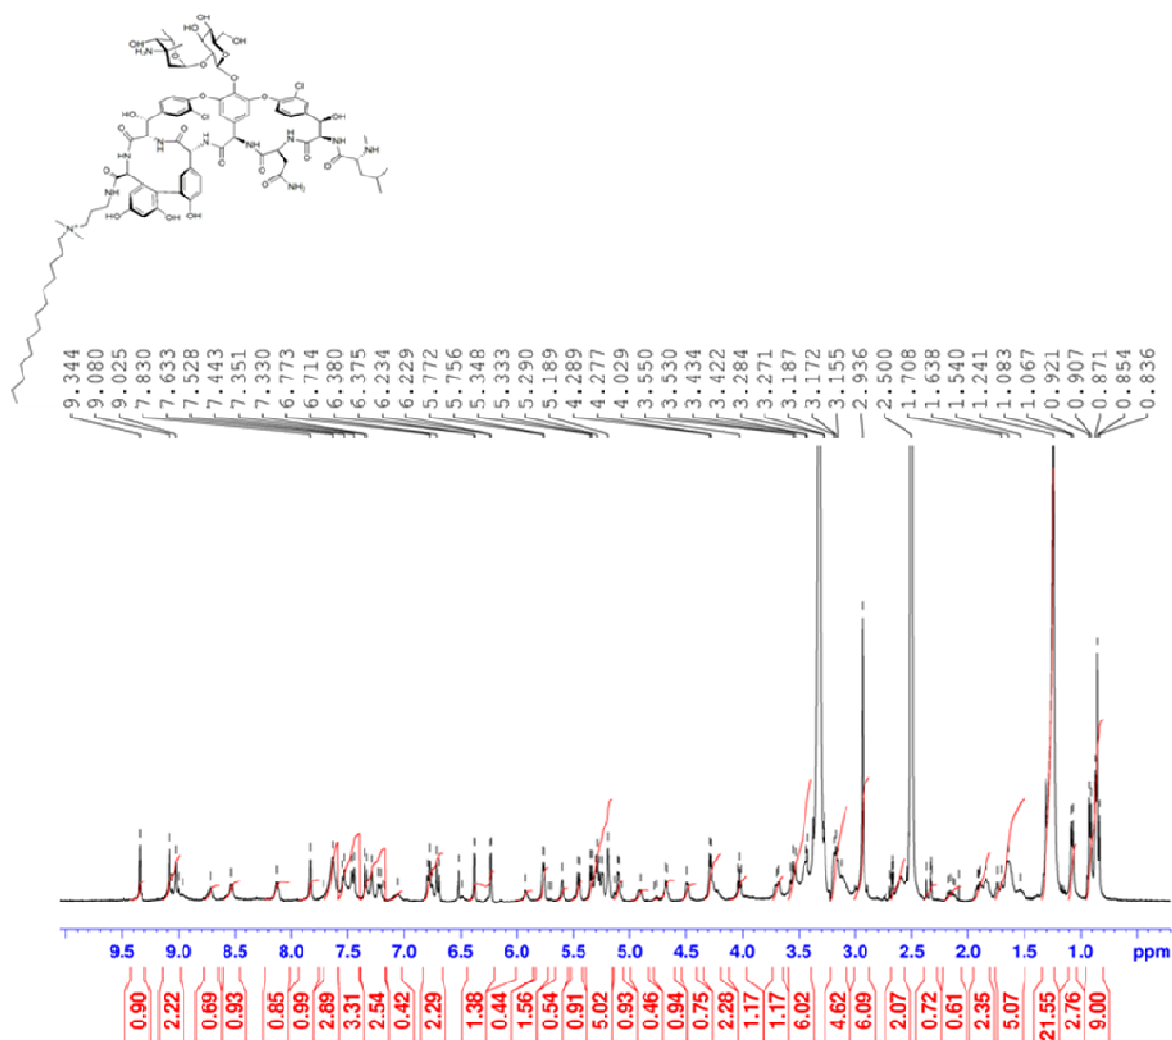

# Compound 6:

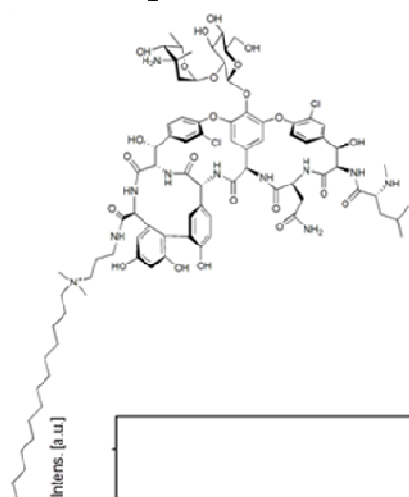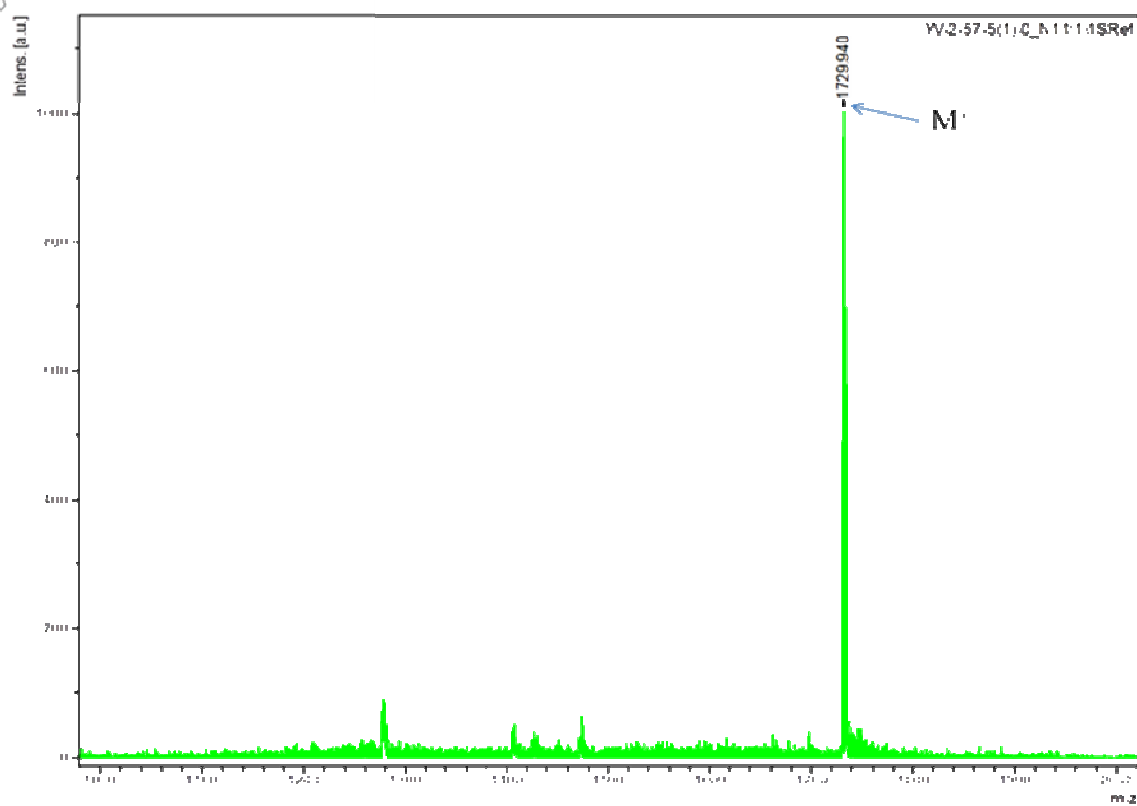

Compound 7:

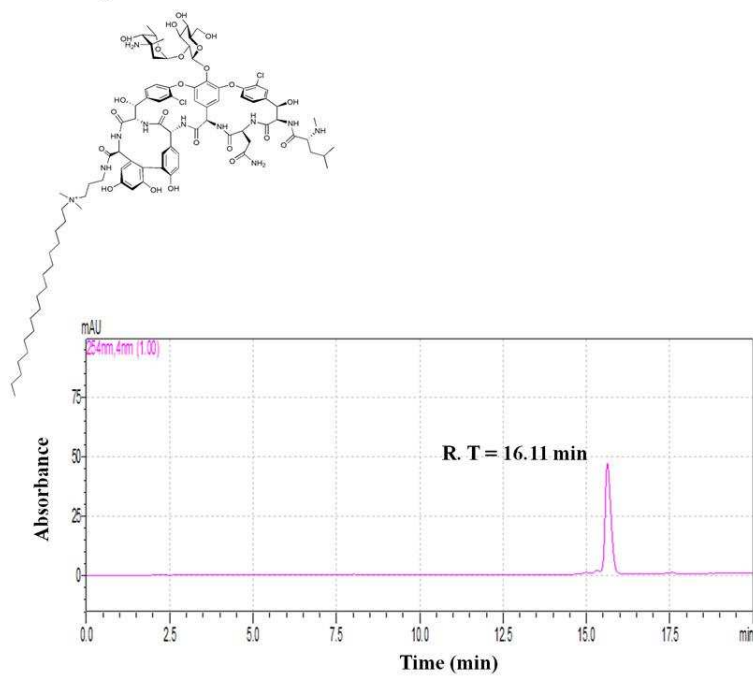

# Compound 7:

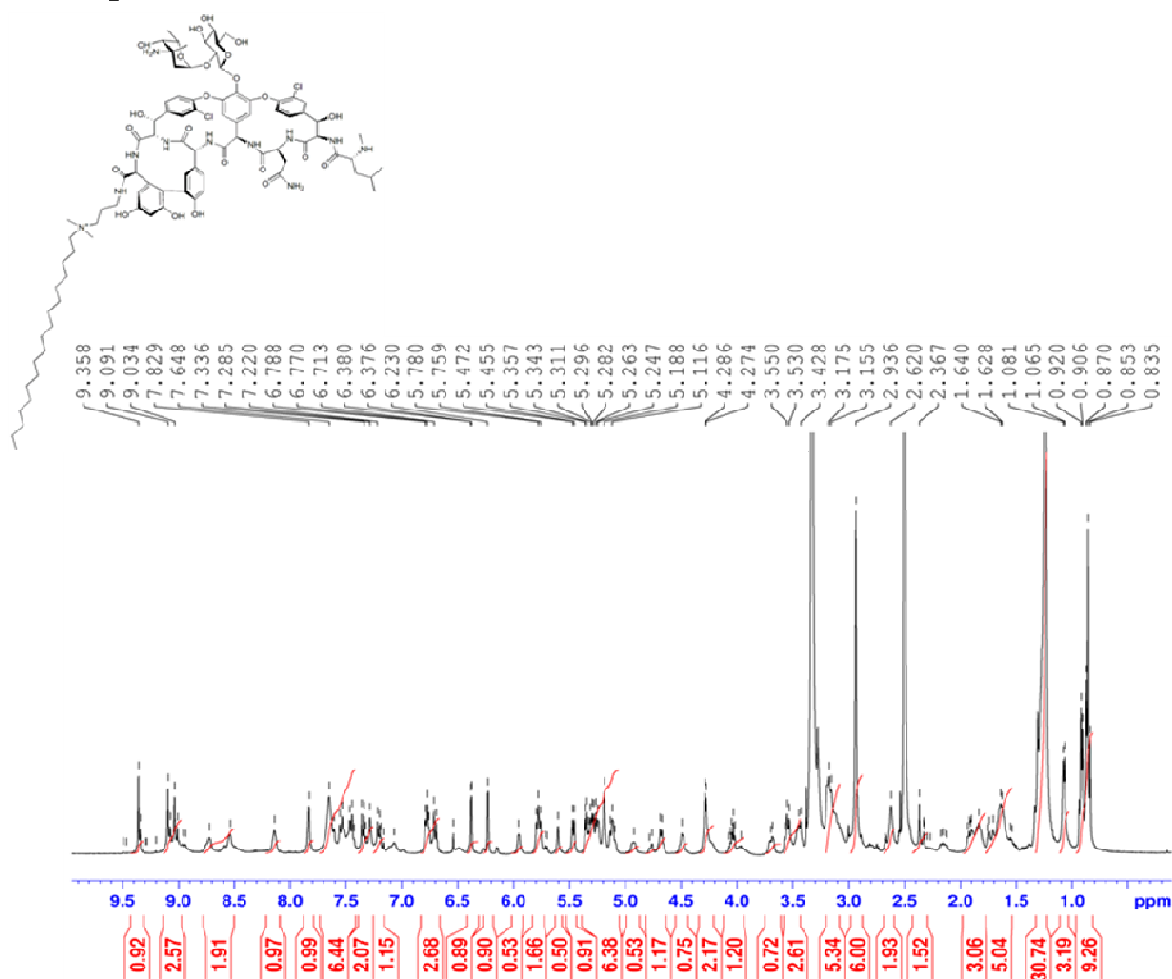

Compound 7:

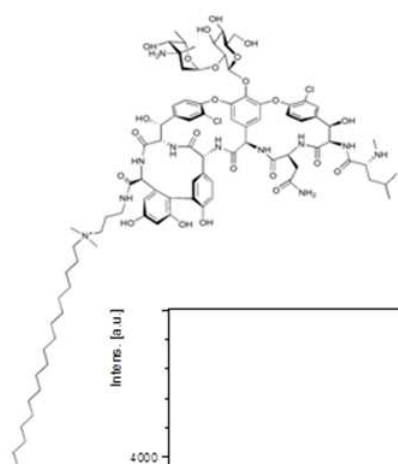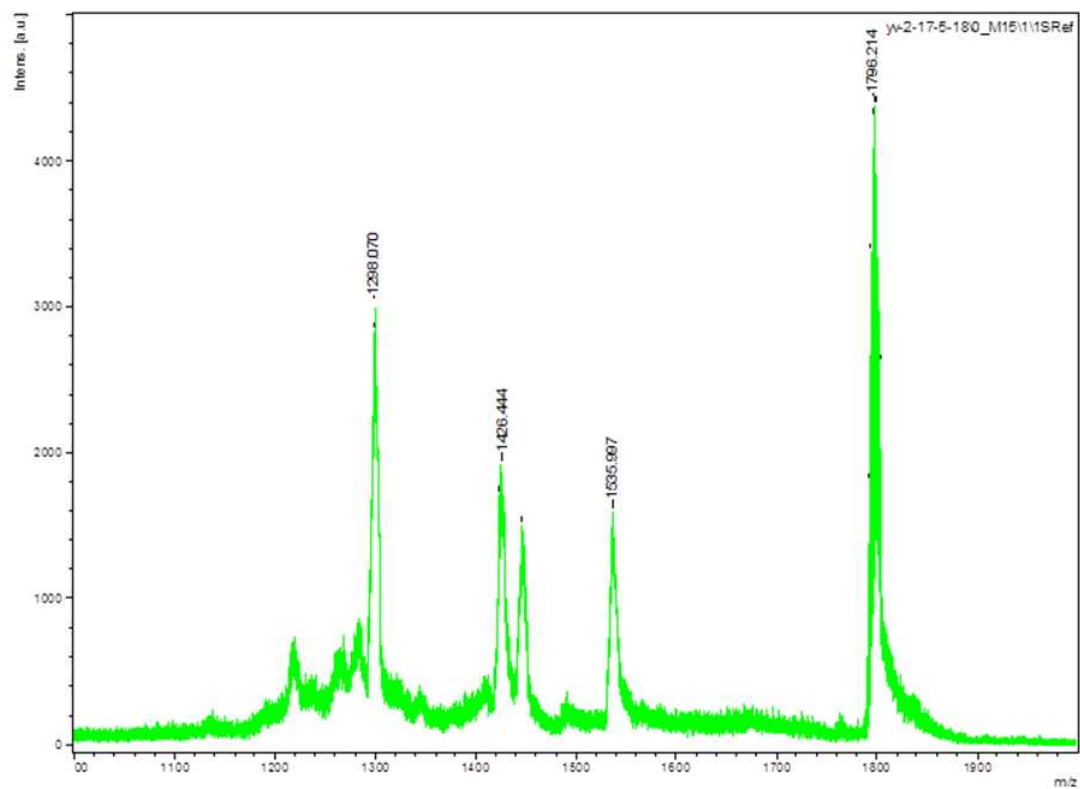

Compound 13:

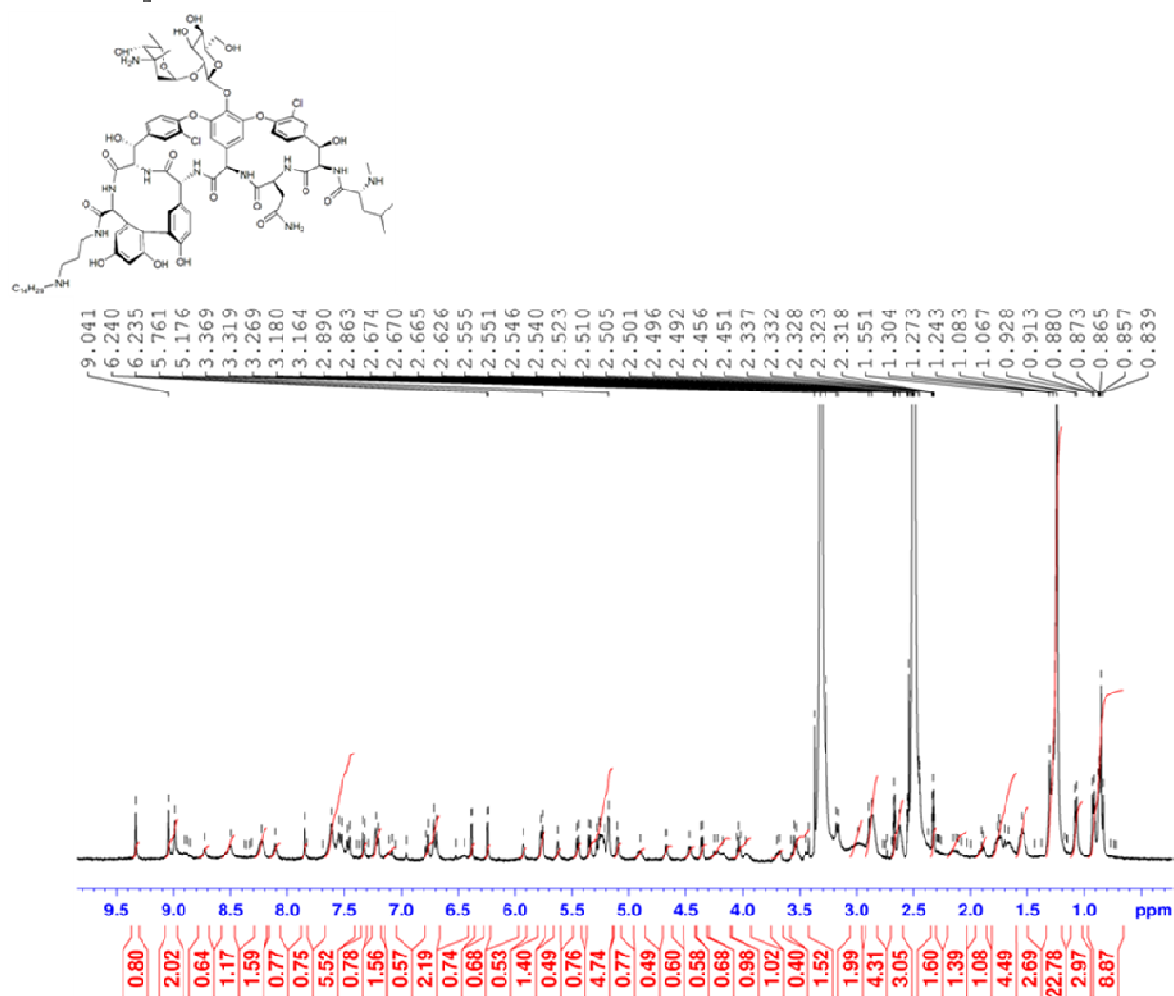



# Compound 13:

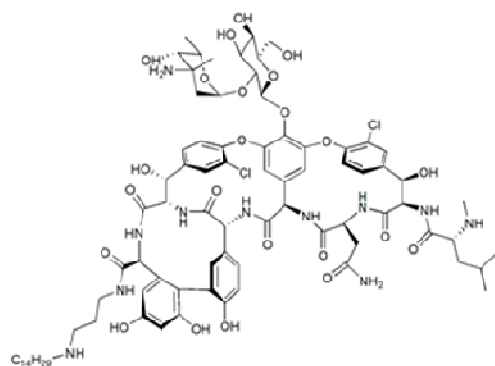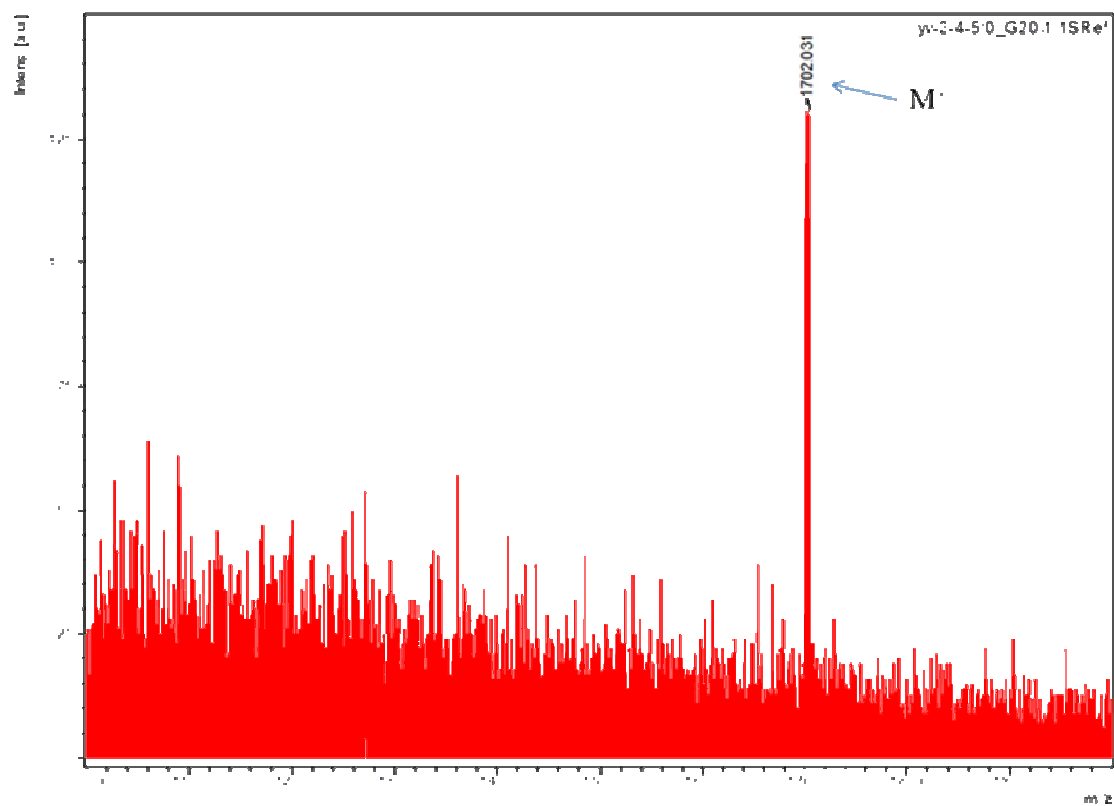

Supplement: Supplementary file 1 [file 3919168]
